# Supplementary material
Source: publisher figshare collection journal article supplement (https://plos.figshare.com/ndownloader/files/12908291)
Supplement: Supplementary file [file 12908291]

**Table S1A.** Quality control of proteomic data by protein identification probability, presented as average in patients with paracoccidioidomycosis, evaluated before treatment (at admission) - G1, G2, G3 patients groups and healthy individuals - G4 group.

| Protein                       | Access code | Molecular mass (kDa) | Coverage rate (%) | [G1] <i>P. brasiliensis</i> with relapse AF (n=1) / CF (n=2) (%) | [G2] Patients with <i>P. lutzii</i> CF (n=4) (%) | [G3] <i>P. brasiliensis</i> without relapse AF (n=2) / CF (n=2) (%) | [G4] Control group (n=3) (%) | Main function                                        |
|-------------------------------|-------------|----------------------|-------------------|------------------------------------------------------------------|--------------------------------------------------|---------------------------------------------------------------------|------------------------------|------------------------------------------------------|
| 1. Serum albumin              | P02768.2    | 69                   | 79                | 100                                                              | 100                                              | 100                                                                 | 100                          | Transport                                            |
| 2. Transferrin                | P02787.3    | 77                   | 34                | 100                                                              | 100                                              | 100                                                                 | 100                          | Transport                                            |
| 3. Apolipoprotein A-I         | P02647.1    | 31                   | 36                | 67                                                               | 100                                              | 100                                                                 | 100                          | Transport                                            |
| 4. Haptoglobin                | P00738.1    | 45                   | 14                | 100                                                              | 100                                              | 100                                                                 | 100                          | Immunomodulatory                                     |
| 5. Ig kappa chain C region    | P01834.2    | 12                   | ...               | 100                                                              | 100                                              | 100                                                                 | 100                          | Immunomodulatory                                     |
| 6. Ig gamma-1 chain C region  | P01857.1    | 36                   | ...               | 100                                                              | 100                                              | 100                                                                 | 100                          | Immunomodulatory                                     |
| 7. Ig lambda-2 chain C region | P0DOY2      | 11                   | 75                | 100                                                              | 100                                              | 100                                                                 | 100                          | Immunomodulatory                                     |
| 8. Alpha-2-macroglobulin      | P01023.3    | 163                  | 05                | 75                                                               | 100                                              | 100                                                                 | 100                          | Activate/regulate the complement system              |
| 9. Ig alpha-1 chain C region  | P01876.2    | 38                   | 29                | 100                                                              | 100                                              | 100                                                                 | 100                          | Immunomodulatory                                     |
| 10. Alpha-1-antitrypsin       | P01009.3    | 47                   | 08                | 66                                                               | 92                                               | 100                                                                 | 100                          | Activate the coagulation/protease-inhibition pathway |
| 11. Hemopexin                 | P02790.2    | 52                   | 19                | 56                                                               | 100                                              | 94                                                                  | 100                          | Transport                                            |
| 12. Ig gamma-2 chain C region | P01859.2    | 36                   | 29                | 92                                                               | 100                                              | 100                                                                 | 100                          | Immunomodulatory                                     |

AF - acute / subacute form; CF- chronic form; n- number of participants; ... sequence not in database.

**Table S1B.** Quality control of proteomic data by protein identification probability, presented as average in patients with paracoccidioidomycosis, evaluated before treatment (at admission) - G1, G2, G3 patients groups and healthy individuals - G4 group.

| Protein                                     | Access code | Molecular mass (kDa) | Coverage rate (%) | [G1] <i>P. brasiliensis</i> with relapse AF (n=1) / CF (n=2) (%) | [G2] Patients with <i>P. lutzii</i> CF (n=4) (%) | [G3] <i>P. brasiliensis</i> without relapse AF (n=2) / CF (n=2) (%) | [G4] Control group (n=3) (%) | Main function                                  |
|---------------------------------------------|-------------|----------------------|-------------------|------------------------------------------------------------------|--------------------------------------------------|---------------------------------------------------------------------|------------------------------|------------------------------------------------|
| <b>13.</b> <i>Alpha-1-acid-glycoprotein</i> | P02763.1    | 24                   | 19                | 66                                                               | 74                                               | 100                                                                 | 99                           | Transport                                      |
| <b>14.</b> <i>Complement C3</i>             | P01024.2    | 187                  | 05                | 25                                                               | 78                                               | 68                                                                  | 89                           | Immunomodulatory                               |
| <b>15.</b> <i>Apolipoprotein A-II</i>       | P02652.1    | 11                   | 58                | 43                                                               | 66                                               | 59                                                                  | 100                          | Transport/metabolize lipids                    |
| <b>16.</b> <i>Ig gamma-3 chain C region</i> | P01860.2    | 41                   | ...               | 92                                                               | 99                                               | 96                                                                  | 98                           | Immunomodulatory                               |
| <b>17.</b> <i>Ig gamma-4 chain C region</i> | P01861.1    | 36                   | 23                | 84                                                               | 85                                               | 92                                                                  | 89                           | Immunomodulatory                               |
| <b>18.</b> <i>Vitamin D-Binding Protein</i> | P02774.1    | 53                   | 05                | 11                                                               | 32                                               | 32                                                                  | 60                           | Immunomodulatory                               |
| <b>19.</b> <i>Ceruloplasmin</i>             | P00450.1    | 122                  | 01                | 0                                                                | 55                                               | 57                                                                  | 11                           | Transport                                      |
| <b>20.</b> <i>Complement C4-A</i>           | P0C0L4.2    | 193                  | 01                | 4                                                                | 24                                               | 29                                                                  | 44                           | Immunomodulatory                               |
| <b>21.</b> <i>Alpha-1-antichymotrypsin</i>  | P01011.2    | 48                   | 02                | 11                                                               | 25                                               | 42                                                                  | 0                            | protease-inhibition pathway/ metabolize lipids |
| <b>22.</b> <i>Kininogen</i>                 | P01042.2    | 72                   | 02                | 11                                                               | 34                                               | 11                                                                  | 11                           | protease-inhibition pathway                    |

AF - acute / subacute form; CF- chronic form; n- number of participants; ... sequence not in database.

**Table S1C.** Quality control of proteomic data by protein identification probability, presented as average in patients with paracoccidioidomycosis, evaluated before treatment (at admission) - G1, G2, G3 patients groups and healthy individuals - G4 group.

| Protein                              | Access code | Molecular mass (kDa) | Coverage rate (%) | [G1] <i>P. brasiliensis</i> with relapse AF (n=1) / CF (n=2) (%) | [G2] Patients with <i>P. lutzii</i> FC (n=4) (%) | [G3] <i>P. brasiliensis</i> without relapse FA (n=2) / FC (n=2) (%) | [G4] Control group (n=3) (%) | Main function        |
|--------------------------------------|-------------|----------------------|-------------------|------------------------------------------------------------------|--------------------------------------------------|---------------------------------------------------------------------|------------------------------|----------------------|
| 23. <i>Ig alpha-2 chain C region</i> | P01877.3    | 37                   | 08                | 0                                                                | 0                                                | 0                                                                   | 0                            | Immunomodulatory     |
| 24. <i>Beta-globin</i>               | P68871.2    | 16                   | 09                | 26                                                               | 66                                               | 24                                                                  | 31                           | Transport            |
| 25. <i>Ig kappa chain V-III</i>      | P04433.1    | 13                   | 08                | 11                                                               | 56                                               | 24                                                                  | 21                           | Immunomodulatory     |
| 26. <i>Beta-2-glycoprotein 1</i>     | P02749.3    | 38                   | 15                | 11                                                               | 39                                               | 16                                                                  | 75                           | Extracellular matrix |
| 27. <i>Ig heavy chain V-III TIL</i>  | P01764.2    | 12                   | 26                | 22                                                               | 0                                                | 33                                                                  | 11                           | Immunomodulatory     |
| 28. <i>Complement factor B</i>       | P00751.2    | 86                   | 01                | 0                                                                | 29                                               | 32                                                                  | 32                           | Immunomodulatory     |
| 29. <i>Alpha-globin</i>              | P69905.2    | 15                   | 11                | 0                                                                | 25                                               | 2                                                                   | 0                            | Transport            |

AF - acute / subacute form; CF- chronic form; n- number of participants; ... sequence not in database.

**DATABASE SEARCHING--** Tandem mass spectra were extracted by [unknown] version [unknown]. Charge state deconvolution and deisotoping were not performed. All MS/MS samples were analyzed using Mascot (Matrix Science, London, UK; version 2.3.02). Mascot was set up to search the Uniprot\_Human\_canonical\_isoforms\_release\_17032016 database (unknown version, 92180 entries) assuming the digestion enzyme trypsin. Mascot was searched with a fragment ion mass tolerance of 0,100 Da and a parent ion tolerance of 0,100 Da. Carbamidomethyl of cysteine was specified in Mascot as a fixed modification. Oxidation of methionine was specified in Mascot as a variable modification.

**CRITERIA FOR PROTEIN IDENTIFICATION--** Scaffold (version Scaffold\_4.7.5, Proteome Software Inc., Portland, OR) was used to validate MS/MS based peptide and protein identifications. Peptide identifications were accepted if they could be established at greater than 24,0% probability to achieve an FDR less than 0,1% by the Scaffold Local FDR algorithm. Protein identifications were accepted if they could be established at greater than 99,0% probability to achieve an FDR less than 1,0% and contained at least 2 identified peptides. Protein probabilities were assigned by the Protein Prophet algorithm (Nesvizhskii, Al et al Anal. Chem. 2003;75(17):4646-58). Proteins that contained similar peptides and could not be differentiated based on MS/MS analysis alone were grouped to satisfy the principles of parsimony. Proteins sharing significant peptide evidence were grouped into clusters.
